# Supplementary material
Source: PubMed Central journal article supplement (PMC3093948)

**A**

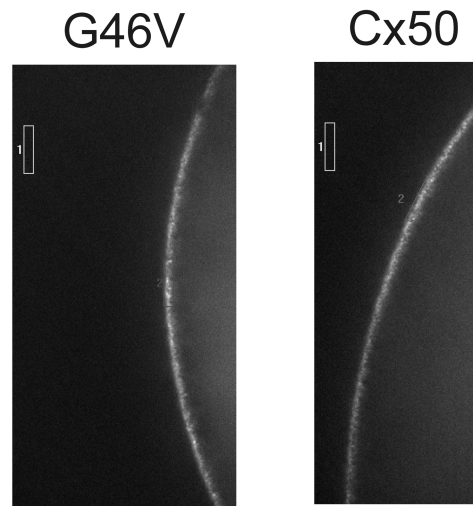

**B**

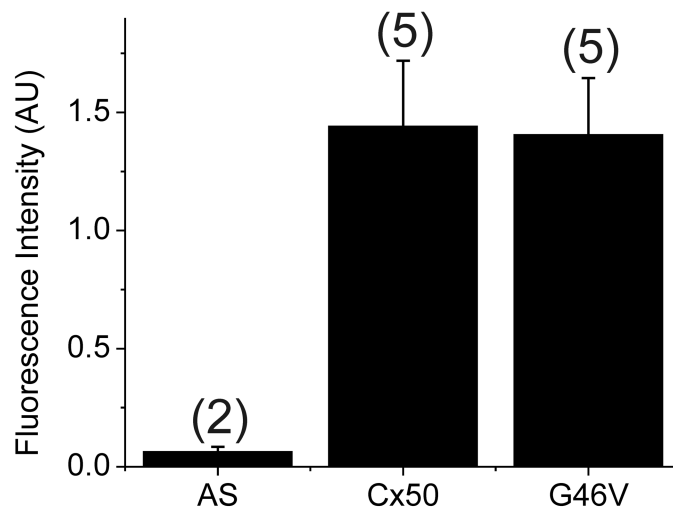

Supplement: supp_00384.2010_Tong_et_al_Fig_4-original.pdf [file supp_00384.2010_Tong_et_al_Fig_4-original.pdf]
